# Supplementary material for: Decreasing HIV transmissions to African American women through interventions for men living with HIV post-incarceration: An agent-based modeling study
Source: PLOS journal article supplement (doi:10.1371/journal.pone.0219361), 2019-07-15
Supplement: S7 (10.1371/journal.pone.0219361.s007) [file journal.pone.0219361.s007]

**S7 Table.** Parameters related to injection drug use.

| Variable                                                                                                    | Base estimate           |                           | Data Source                         |
|-------------------------------------------------------------------------------------------------------------|-------------------------|---------------------------|-------------------------------------|
|                                                                                                             | <i>Male PWID Agents</i> | <i>Female PWID Agents</i> |                                     |
| Receptive sharing of syringes, injecting equipment, or using a syringe to divide drugs (annual probability) | 69%                     | 63%                       | NHBS IDU-2015 Philadelphia          |
| Median number of injection partners in past year with receptive syringe sharing (Q1, Q3)                    | 2 (1, 3.5)              | 3 (1, 3)                  | NHBS IDU-2015 Philadelphia          |
| Mean number of needle-sharing acts per day                                                                  | 4                       | 4                         | Johnson <i>et al.</i> <sup>51</sup> |
| Probability of cessation of injection drug use per month                                                    | 0.2%                    |                           | Galai <i>et al.</i> <sup>50</sup>   |
